# Supplementary material for: A Bayesian model for assessing organic matter supply in complex marine food webs using amino acid stable isotope analysis
Source: PeerJ. 2025 Nov 19;13:e20220. doi: 10.7717/peerj.20220 (PMC12640130; doi:10.7717/peerj.20220)
Supplement: Supplemental Information 5 — Simulated sample ID numbers are stored in column A, true values for the fractional contribution of surface, deep large, and deep small particles in columns B-D, protistan trophic steps, metazoan trophic steps, and food web length in columns E-G, and amino acid δ15N values (‰) are columns H-P. [file peerj-13-20220-s005.xlsx]

## Sheet: Sheet1
Sample	Surface	Large	Small	PTS	MTS	FWL	d15NAla	d15NPro	d15NSer	d15NGly	d15NLys	d15NThr	d15NGlx	d15NAsx	d15NPhe
1	0.0606924	0.0298014	0.909506	0.076897	1.09781	1.17471	22.6327	17.026	9.01498	9.12238	6.94556	23.2343	17.6449	-4.12778	6.83034
2	0.151581	0.0314549	0.816964	0.0943903	1.13649	1.23088	21.6822	16.4038	8.19901	8.52224	6.20764	22.3174	16.8477	-4.90098	5.97822
3	0.849996	0.0032488	0.146755	0.241579	1.15279	1.39437	12.8711	10.1606	1.39375	3.22361	0.371261	13.1267	9.2458	-8.85476	-0.504256
4	0.0144945	0.210412	0.775093	0.0496536	1.39395	1.4436	24.1814	18.6552	9.48396	9.88774	6.98674	25.7904	19.3223	-7.13932	6.70539
5	0.497613	0.386642	0.115745	0.0940459	1.35063	1.44467	16.5088	13.2421	3.70949	5.46365	2.06984	18.5064	13.1529	-11.1396	1.48934
6	0.0779765	0.867753	0.0542707	0.132828	1.34616	1.47899	20.5702	16.7076	6.3034	8.00258	3.96845	23.0419	16.5394	-13.0866	3.76818
7	0.240827	0.0296461	0.729527	0.147481	1.36189	1.50937	22.1712	17.0961	7.99206	8.58824	5.76414	22.9424	17.1716	-6.808	5.22074
8	0.0165016	0.295154	0.688344	0.479836	1.03076	1.51059	24.1973	18.8304	9.30118	9.87736	6.72685	22.8732	17.3338	-6.60477	6.40412
9	0.320921	0.373778	0.305301	0.242957	1.30169	1.54465	19.7174	15.6868	5.8779	7.25838	3.79214	20.6133	15.0262	-10.0733	3.24309
10	0.362384	0.466187	0.17143	0.528049	1.0649	1.59295	19.0184	15.3263	5.20136	6.84714	3.13377	18.0822	13.1746	-10.2762	2.53419
11	0.630133	0.362584	0.00728303	0.418339	1.21264	1.63098	15.8986	13.0007	2.89613	4.95009	1.21999	15.8262	11.1964	-11.4875	0.372651
12	0.326053	0.019875	0.654072	0.415318	1.31588	1.7312	22.396	17.5195	7.71158	8.54112	5.31828	21.5767	16.1881	-7.45195	4.51283
13	0.706419	0.00580503	0.287776	0.651941	1.20198	1.85392	17.8038	14.3118	4.08782	5.75025	2.17522	15.6644	11.4697	-9.20502	0.987896
14	0.623782	0.333477	0.0427404	0.0352778	1.82853	1.86381	17.5857	14.4832	3.68361	5.74288	1.66604	20.7163	14.5546	-14.0674	0.606642
15	0.234158	0.530906	0.234937	0.648551	1.22463	1.87318	22.3254	18.1367	7.02145	8.58766	4.35091	21.0049	15.4473	-11.3232	3.60502
16	0.156114	0.0562718	0.787614	0.34181	1.53306	1.87487	25.5641	20.0355	9.72738	10.2969	6.8461	25.4938	19.1846	-7.97614	6.03984
17	0.503802	0.138561	0.357637	0.28075	1.62665	1.90741	20.4408	16.4253	5.83075	7.30389	3.51522	21.3083	15.5075	-11.0179	2.45439
18	0.3034	0.323764	0.372836	0.667748	1.25598	1.92373	22.5785	18.1811	7.24592	8.61498	4.59148	20.8151	15.4449	-10.1227	3.70161
19	0.05292	0.590986	0.356094	0.829324	1.10665	1.93597	25.0397	20.2472	8.85187	10.1508	5.79083	22.4652	16.7975	-10.5229	5.13055
20	0.893306	0.102761	0.00393251	0.646679	1.3142	1.96088	15.3788	12.7704	2.01699	4.28402	0.291458	13.7995	9.71901	-11.7189	-1.10057
21	0.817027	0.0169313	0.166041	0.644107	1.34023	1.98434	16.9975	13.8939	3.22004	5.17966	1.31697	15.2419	10.9701	-10.7049	-0.0630028
22	0.303273	0.586249	0.110478	0.158396	1.85167	2.01006	21.9549	18.0868	6.43143	8.28446	3.69686	24.7096	17.6917	-14.9006	2.79233
23	0.630668	0.0028488	0.366483	0.957637	1.05737	2.01501	19.9128	16.0398	5.31469	6.85685	3.04572	15.6935	11.7544	-8.52443	1.7661
24	0.0658916	0.546961	0.387147	0.25201	1.76825	2.02026	25.5817	20.7013	9.10912	10.3845	5.94555	27.3972	20.0848	-12.9595	5.18971
25	0.520952	0.307922	0.171126	0.408278	1.63488	2.04315	20.2968	16.6497	5.33218	7.17878	2.88255	20.8067	14.9835	-12.8878	1.72808
26	0.0487969	0.207499	0.743705	0.596448	1.45184	2.04829	27.5144	21.8127	10.7071	11.3612	7.42189	26.0691	19.7103	-8.73619	6.57146
27	0.174033	0.787586	0.0383816	0.379873	1.68511	2.06498	23.2483	19.2906	7.13491	9.07714	4.1324	24.7645	17.8104	-15.4071	3.31782
28	0.439228	0.467272	0.0935002	0.696197	1.40579	2.10199	21.1239	17.4779	5.71273	7.67891	3.06492	19.8499	14.3807	-13.0522	1.95332
29	0.105479	0.127949	0.766572	0.525305	1.62108	2.14638	27.6779	21.9735	10.6815	11.3485	7.34416	26.8068	20.2025	-9.20966	6.34642
30	0.227677	0.308857	0.463467	0.827718	1.32486	2.15258	25.1672	20.329	8.69607	9.94438	5.58857	22.507	16.8634	-10.3065	4.54252
31	0.201946	0.000684407	0.79737	0.348224	1.8575	2.20573	27.242	21.6046	10.3261	10.9967	7.05184	27.6026	20.6784	-9.66967	5.90218
32	0.359382	0.19165	0.448968	0.731372	1.53879	2.27017	24.5507	19.909	8.08175	9.44483	5.01805	22.6621	16.849	-11.0749	3.74525
33	0.0186783	0.839336	0.141985	0.948938	1.37088	2.31982	26.8402	22.265	9.22556	10.9994	5.60694	24.5179	18.0837	-14.2942	4.6849
34	0.559143	0.00470787	0.436149	0.84259	1.48567	2.32826	22.8987	18.5954	6.87369	8.35876	4.04334	20.0269	14.9067	-10.4474	2.53264
35	0.952703	0.0466276	0.00066953	0.495064	1.86203	2.3571	17.2774	14.5789	2.64522	5.06124	0.458461	17.4339	12.208	-14.4836	-1.34549
36	0.0802993	0.91459	0.0051103	0.382505	1.97479	2.3573	25.8618	21.6712	8.37695	10.4264	4.82367	28.054	20.1636	-17.7149	3.84253
37	0.829727	0.0247459	0.145527	0.70874	1.66805	2.37679	19.2539	16.0204	4.07593	6.19433	1.64651	17.7063	12.7248	-12.9056	-0.0937426
38	0.24411	0.338172	0.417718	0.450485	1.94207	2.39256	26.314	21.4835	9.03106	10.438	5.62046	26.9644	19.8111	-13.5381	4.35388
39	0.634017	0.142575	0.223408	0.553476	1.90455	2.45802	22.0336	18.257	5.87755	7.80382	3.01592	21.8944	15.8268	-13.9479	1.36874
40	0.0128537	0.986473	0.000673608	0.814252	1.67585	2.49011	27.3407	22.9789	9.14639	11.2157	5.3023	26.6228	19.3639	-17.072	4.2664
41	0.516103	0.417838	0.0660595	0.654733	1.93476	2.58949	23.3183	19.6191	6.36802	8.55999	3.16231	23.1359	16.6338	-16.0795	1.54592
42	0.945083	0.000868192	0.054049	0.907291	1.71472	2.62201	19.2589	16.2985	3.59545	5.9946	1.01756	16.6725	11.9136	-13.9994	-1.03041
43	0.0380393	0.960361	0.00159975	0.830246	1.79238	2.62262	27.9325	23.5452	9.32966	11.4475	5.33932	27.2833	19.8301	-17.7017	4.16014
44	0.00287613	0.277425	0.719699	0.962333	1.68946	2.65179	31.6603	25.6312	12.4818	13.34	8.28357	28.6104	21.6785	-11.2276	6.93911
45	0.323036	0.350138	0.326826	0.906315	1.74982	2.65614	26.7949	22.1652	8.83923	10.5164	5.19733	24.557	18.1542	-13.85	3.64079
46	0.0243127	0.560258	0.415429	0.737305	1.93818	2.67548	30.2437	24.9033	11.1971	12.6025	7.04672	29.5312	21.8738	-14.8216	5.73368
47	0.777291	0.20984	0.0128692	0.778043	1.93281	2.71085	21.2822	18.0822	4.76215	7.19084	1.80367	20.1335	14.3582	-15.93	-0.155895
48	0.0209151	0.170783	0.808302	0.770654	1.97566	2.74631	32.4734	26.2342	12.9606	13.6998	8.64442	30.8108	23.2544	-11.7038	7.17661
49	0.133569	0.196622	0.669808	0.928777	1.84312	2.7719	30.9119	25.1536	11.7404	12.7755	7.58637	28.2427	21.2793	-12.0771	6.02234
50	0.296721	0.625205	0.0780739	0.821162	1.95095	2.77211	26.6758	22.4863	8.32724	10.4628	4.5206	25.8323	18.7517	-17.115	2.94419
