# Supplementary material for: A Bayesian model for assessing organic matter supply in complex marine food webs using amino acid stable isotope analysis
Source: PeerJ. 2025 Nov 19;13:e20220. doi: 10.7717/peerj.20220 (PMC12640130; doi:10.7717/peerj.20220)
Supplement: Supplemental Information 6 — The species name and number of experimental replicates are stored in column A, common name in column B, designation as a protozoan or metazoan in column C, diet in column D, amino acid δ15N values in columns E-Q, presumed trophic position in column S, mode of nitrogen excretion in column T, sample type in column U, natural habitat type in column V, and original reference in column W. This table is an adaptation of that provided in McMahon & McCarthy (2016). [file peerj-13-20220-s006.xlsx]

## Sheet: Sheet 1
Species	Common name	ProMet	Diet	d15NGlx	d15NAsx	d15NAla	d15NIle	d15NLeu	d15NPro	d15NVal	d15NGly	d15NSer	d15NPhe	d15NLys	d15NMet	d15NThr	Zero	TP	Excretion	Tissue	System	Citation
Acanthopagrus butcheri (n = 3)	southern black bream	Metazoan	Hatchery feed	10.2	6.2	0.7	9.7	9.1	8.5	-0.4	-2.5	3.4	0.1	-1.2		-10.7	0	2.5	ammonia	muscle	marine	Bloomfield, A. L., T. S. Elsdon, B. D. Walther, E. J. Gier, and B. M. Gillanders. 2011. Temperature and diet affect carbon and nitrogen isotopes of fish muscle: can amino acid nitrogen isotopes explain effects? Journal of Experimental Marine Biology and Ecology 399:48-59.
Acanthopagrus butcheri (n = 6)	southern black bream	Metazoan	Fish meal	11.2	7.2	5.5	7.4	6.1	6.8	-1.3	-0.3	4	1.6	-0.1		-10.1	0	3	ammonia	muscle	marine	Bloomfield, A. L., T. S. Elsdon, B. D. Walther, E. J. Gier, and B. M. Gillanders. 2011. Temperature and diet affect carbon and nitrogen isotopes of fish muscle: can amino acid nitrogen isotopes explain effects? Journal of Experimental Marine Biology and Ecology 399:48-59.
Paralichthys olivaveus (n = 1)	olive flounder	Metazoan	rotifer	9.4		2.9	6.5	5.6	5.9	5.3	12.5	1.3	0.7				0	3	ammonia	muscle	marine	Chikaraishi, Y., N. O. Ogawa, Y. Kashiyama, Y. Takano, H. Suga, A. Tomitani, H. Miyashita, H. Kitazato, and N. Ohkouchi. 2009. Determination of aquatic food_web structure based on compound_specific nitrogen isotopic composition of amino acids. Limnology and Oceanography: Methods 7:740-750.
Sebastes schlegeli (n = 1)	Korean Rockfish	Metazoan	rotifer	9		9.2	4.2	6.6	5.9	3	3.7	7.5	0.2				0	3	ammonia	muscle	marine	Chikaraishi, Y., N. O. Ogawa, Y. Kashiyama, Y. Takano, H. Suga, A. Tomitani, H. Miyashita, H. Kitazato, and N. Ohkouchi. 2009. Determination of aquatic food_web structure based on compound_specific nitrogen isotopic composition of amino acids. Limnology and Oceanography: Methods 7:740-750.
Batillus cornutus (n = 1)	Japanese turban shell	Metazoan	brown macroalgae	7.7		8.3	7.5	8.3		5.6	4.7	6.1	0.2				0	2	ammonia	Shell	marine	Chikaraishi, Y., S. A. Steffan, N. O. Ogawa, N. F. Ishikawa, Y. Sasaki, M. Tsuchiya, and N. Ohkouchi. 2014. High_resolution food webs based on nitrogen isotopic composition of amino acids. Ecology and Evolution 4:2423-2449.
Haliotis discus (n = 1)	disk abalone	Metazoan	brown macroalgae	4.9		4.8	2.1	0.9	3.7	3.1	3.4	-1.5	-0.6				0	2	ammonia	Shell	marine	Chikaraishi, Y., S. A. Steffan, N. O. Ogawa, N. F. Ishikawa, Y. Sasaki, M. Tsuchiya, and N. Ohkouchi. 2014. High_resolution food webs based on nitrogen isotopic composition of amino acids. Ecology and Evolution 4:2423-2449.
Omphalius pfeifferi (n = 1)	marine gastropod	Metazoan	brown macroalgae	6.8		7.5	2.6	3.9	2.1	2.4	3.8	1.7	-0.4				0	2	ammonia	Shell	marine	Chikaraishi, Y., S. A. Steffan, N. O. Ogawa, N. F. Ishikawa, Y. Sasaki, M. Tsuchiya, and N. Ohkouchi. 2014. High_resolution food webs based on nitrogen isotopic composition of amino acids. Ecology and Evolution 4:2423-2449.
Batillus cornutus (n = 2)	Japanese turban shell	Metazoan	brown macroalgae	9.8		8.9	8.5	8.7	7.8	7.4	6	8.9	0.9		1.1		0	2	ammonia	muscle	marine	Chikaraishi, Y., Y. Kashiyama, N. O. Ogawa, H. Kitazato, and N. Ohkouchi. 2007. Metabolic control of nitrogen isotope composition of amino acids in macroalgae and gastropods: implications for aquatic food web studies. Marine Ecology Progress Series 342:85-90.
Haliotis discus (n = 2)	disk abalone	Metazoan	brown macroalgae	6.6		5	3.8	2.2	6.5	5.1	3.9	1.3	0.2		-0.1		0	2	ammonia	muscle	marine	Chikaraishi, Y., Y. Kashiyama, N. O. Ogawa, H. Kitazato, and N. Ohkouchi. 2007. Metabolic control of nitrogen isotope composition of amino acids in macroalgae and gastropods: implications for aquatic food web studies. Marine Ecology Progress Series 342:85-90.
Omphalius pfeifferi (n = 2)	marine gastropod	Metazoan	brown macroalgae	8.1		7.5	3.2	5	5.4	3.8	4.7	4.2	0.3		0.5		0	2	ammonia	muscle	marine	Chikaraishi, Y., Y. Kashiyama, N. O. Ogawa, H. Kitazato, and N. Ohkouchi. 2007. Metabolic control of nitrogen isotope composition of amino acids in macroalgae and gastropods: implications for aquatic food web studies. Marine Ecology Progress Series 342:85-90.
Fundulus heteroclitus (n = 3)	common mummichog	Metazoan	plant meal	10.8	8.5	11.7	9.4	10	7.3	8.8	1	1.5	0.4	3		-7.2	0	2	ammonia	muscle	marine	McMahon, K. W., T. Elsdon, S. R. Thorrold, and M. D. McCarthy. 2015a. Trophic discrimination of nitrogen stable isotopes in amino acids varies with diet quality in a marine fish. Limnology and Oceanography 60:1076-1087.
Fundulus heteroclitus (n = 3)	common mummichog	Metazoan	plant, fish meal	7.3	7	7.5	6.4	6.6	7	7.6	-0.1	0.2	0.1	1.8		-4.1	0	3	ammonia	muscle	marine	McMahon, K. W., T. Elsdon, S. R. Thorrold, and M. D. McCarthy. 2015a. Trophic discrimination of nitrogen stable isotopes in amino acids varies with diet quality in a marine fish. Limnology and Oceanography 60:1076-1087.
Fundulus heteroclitus (n = 3)	common mummichog	Metazoan	clam	6.9	5.4	7.8	5.2	5.5	6.7	5	1.6	0.7	1	1.8		-9	0	3	ammonia	muscle	marine	McMahon, K. W., T. Elsdon, S. R. Thorrold, and M. D. McCarthy. 2015a. Trophic discrimination of nitrogen stable isotopes in amino acids varies with diet quality in a marine fish. Limnology and Oceanography 60:1076-1087.
Litopenaeus vannamei (n = 2)	whiteleg shrimp	Metazoan	fish pellet	7.2	1.9	2.1	2.9	3.6	7	5.3	1.2	3	0.6	0.2	6.4	-3.6	0	3	ammonia	muscle	marine	Downs, E. E., B. N. Popp, and C. M. Holl. 2014. Nitrogen isotope fractionation and amino acid turnover rates in the Pacific white shrimp Litopenaeus vannamei. Marine Ecology Progress Series 516:239-250.
Brachionus plicatilis (n = 2)	rotifer	Metazoan	green microalgae	6.7	4.5	5	3.9	3.4	4	3.7	0.9	0.8	0.3	2		-1.4	0	2	ammonia	whole	marine	McClelland, J. W., and J. P. Montoya. 2002. Trophic relationships and the nitrogen isotopic composition of amino acids in plankton. Ecology 83:2173-2180.
Brachionus plicatilis (n = 2)	rotifer	Metazoan	green microalgae	8		5.7	4.5	4.2	7.8	6.6	0.5	3.8	0.4				0	2	ammonia	whole	marine	Chikaraishi, Y., N. O. Ogawa, Y. Kashiyama, Y. Takano, H. Suga, A. Tomitani, H. Miyashita, H. Kitazato, and N. Ohkouchi. 2009. Determination of aquatic food_web structure based on compound_specific nitrogen isotopic composition of amino acids. Limnology and Oceanography: Methods 7:740-750.
C. pacificus	copepod	Metazoan	green microalgae	6	5.25	7.85	6.2	5.3	5.55	4.25	1.6	7.15	-0.7	0.7		-1.35	0	3	ammonia	whole	marine	Décima, M. et al. (2017) ‘Alanine δ15N trophic fractionation in heterotrophic protists’, Limnology and Oceanography, 62(5), pp. 2308–2322.
Acartia steueri (n = 2)	copepod	Metazoan	haptophyte microalgae	8									0.1				0	2	ammonia	whole	marine	Nakatomi, N., M. Hirahara, N. Natori, T. Toda, and S. Yamamoto. 2014. Change in metabolism and nitrogen isotopic composition of amino acids through egg production of the calanoid copepod Acartia steueri. Research in Organic Geochemsitry 29:61-64.
Oxyrrhis marina (n =4)	phagotrophic dinoflagellate	Protozoan	green microalgae	0.3	0.2	8.1	1.7	1.8	3.5	0.6	5.1	-1.6	0.8	2		-1.5	0	3	ammonia	whole	marine	Gutierrez-Rodriguez, A., M. Decima, B. N. Popp, M. R. Landry. 2014. Isotopic invisibility of protozoan trophic steps in marine food webs. Limnology and Oceanography 59:1590-1598.
Oxyrrhis marina (n =1)	phagotrophic dinoflagellate	Protozoan	green microalgae	-0.6	-0.6	4.4	-4.3	0.5	3	-1.1	2.1	-4.6	0.6	1		-1.7	0	2		whole	marine	Décima, M. et al. (2017) ‘Alanine δ15N trophic fractionation in heterotrophic protists’, Limnology and Oceanography, 62(5), pp. 2308–2322.
Favella spp (n =3)	ciliate	Protozoan	green microalgae	1.86667	2.76667	6.4	1.13333	1.83333	6.33333	2.7	4.16667	4.2	-0.533333	2.06667		-2.93333	0	2		whole	marine	Décima, M. et al. (2017) ‘Alanine δ15N trophic fractionation in heterotrophic protists’, Limnology and Oceanography, 62(5), pp. 2308–2322.
				Glu	Asp	Ala	Ile	Leu	Pro	Val	Gly	Ser	Phe	Lys	Met	Thr
		All	mean Δδ15N	6.96032	4.39242	6.3425	4.62667	4.95667	5.8307	3.8725	2.89833	2.6025	0.298413	1.20606	1.975	-4.87121
			SD	3.07392	2.82746	2.56239	3.21173	2.69184	1.74264	2.76963	3.0502	3.24247	0.547479	1.15722	2.58976	3.5113
		Metazoan	mean Δδ15N	8.03333	5.74375	6.35	5.52941	5.58824	6.12187	4.42647	2.74118	3.17941	0.3	1.025	1.975	-5.93125
			SD	1.67066	1.87707	2.70566	2.32626	2.4078	1.63258	2.55976	3.24093	2.79206	0.540576	1.27745	2.58976	3.56116
		Protozoan	mean Δδ15N	0.522222	0.788889	6.3	-0.488889	1.37778	4.27778	0.733333	3.78889	-0.666667	0.288889	1.68889		-2.04444
			SD	1.0192	1.43613	1.51217	2.70477	0.620832	1.46776	1.55421	1.25354	3.6527	0.587104	0.487878		0.63382
		Zooplankton	mean Δδ15N	4.68333	2.33611	5.65	2.29048	2.94762	5.3119	3.15	2.22381	1.82143	0.195833	1.32778	6.4	-2.08056
			SD	3.33908	2.11078	1.92706	3.12251	1.52512	1.71086	2.47285	1.61351	3.6516	0.510837	0.732933	0	0.867436
		Fish + Grastropods	mean Δδ15N	8.36154	6.86	6.71538	5.88462	6.03846	6.13333	4.26154	3.26154	3.02308	0.361538	1.06	0.5	-8.22
			SD	1.80237	1.03846	2.77568	2.46946	2.55961	1.68885	2.84187	3.54043	2.91367	0.559586	1.50413	0.489898	2.37941
